# Supplementary material for: Mechanistic Mathematical Modeling Tests Hypotheses of the Neurovascular Coupling in fMRI
Source: PubMed Central journal article supplement (PMC4911100; doi:10.1371/journal.pcbi.1004971), 2016-06-16
Supplement: pcbi.1004971.s001.pdf [file pcbi.1004971.s001.pdf]

# Appendix / Supplementary material

When using the material in this appendix, please cite Lundengård et al. "Mechanistic mathematical modeling tests hypotheses of the neurovascular coupling in fMRI", PLOS Computational, 2016. DOI: 10.1371/journal.pcbi.1004971.

All models have been uploaded to the model archive biomodels.net, where the model and simulation files can be downloaded.

All models and parameter sets have the same name in the appendix as they have in the article. All steady state values were calculated by simulating the model until steady state has been reached (1000s).

## 1 The metabolic model $M_m$

### 1.1 $M_{m1}$

The metabolic model  $M_{m1}$  assumes that the only mechanism that controls the shape of the BOLD response is that the blood vessels increase the blood flow in response to a lack of oxygen during the stimulus.

#### 1.1.1 States and reactions

| State                                                                                                                         | Interpretation                    |
|-------------------------------------------------------------------------------------------------------------------------------|-----------------------------------|
| $\frac{d(stimulus)}{dt} = 0$                                                                                                  | Stimulus input signal             |
| $\frac{d(oHb)}{dt} = v_{1b} - v_{1f} + v_{inoHb} - v_{outoHb}$                                                                | Change in oxyhemoglobin level     |
| $\frac{d(dHb)}{dt} = v_{1f} - v_{1b} + v_{indHb} - v_{outdHb}$                                                                | Change in deoxyhemoglobin level   |
| $\frac{d(O_2)}{dt} = v_{1f} - v_{1b} - v_{basal} \times proportion_1 - v_{stim} \times proportion_2 + v_{inO_2} - v_{outO_2}$ | Change in oxygen level            |
| $\frac{d(glucose)}{dt} = v_{inG} - v_{outG} - v_{basal} - v_{stim}$                                                           | Change in glucose level           |
| $\frac{d(inputDelay)}{dt} = input_1 - v_{ID}$                                                                                 | Delay state                       |
| $\frac{d(oxygenFbDelay)}{dt} = v_{toOFBD} - v_{OFBD}$                                                                         | Delay state                       |
| $\frac{d(oxygenFbDelay_2)}{dt} = v_{OFBD} - v_{OFBD2}$                                                                        | Delay state                       |
| $\frac{d(oxygenFbDelay_3)}{dt} = v_{toOFBD2} - v_{OFBD3}$                                                                     | Delay state                       |
| $\frac{d(oxygenfeedback)}{dt} = v_{OFBD3} - v_{vOFB}$                                                                         | Oxygen feedback to the blood flow |

| Reaction                                                                                                                                                                                                                                       | Interpretation                                                  |
|------------------------------------------------------------------------------------------------------------------------------------------------------------------------------------------------------------------------------------------------|-----------------------------------------------------------------|
| $v1_f = k1_f \times oHb$                                                                                                                                                                                                                       | Rate of releasing oxyhemoglobin into oxygen and deoxyhemoglobin |
| $v1_b = k1_b \times dHb \times O_2$                                                                                                                                                                                                            | Rate of binding oxygen and deoxyhemoglobin into oxyhemoglobin   |
| $v_{inoHb} = oHb_{body} \times k_{flow}$<br>$v_{outoHb} = oHb \times k_{flow}$                                                                                                                                                                 | Oxyhemoglobin influx<br>Oxyhemoglobin outflux                   |
| $v_{indHb} = dHb_{body} \times k_{flow}$<br>$v_{outdHb} = dHb \times k_{flow}$                                                                                                                                                                 | Deoxyhemoglobin influx<br>Deoxyhemoglobin outflux               |
| $v_{inG} = G_{body} \times k_{flow}$<br>$v_{outG} = glucose \times k_{flow}$                                                                                                                                                                   | Glucose influx<br>Glucose outflux                               |
| $v_{inO_2} = O_{2body} \times k_{flow}$<br>$v_{outO_2} = O_2 \times k_{flow}$                                                                                                                                                                  | Oxygen influx<br>Oxygen outflux                                 |
| $v_{basal} = k_{basal} \times O_2^{proportion_1} \times glucose$<br>$v_{stim} = inputDelay_5 \times O_2^{proportion_2} \times glucose$                                                                                                         | Basal metabolism<br>Metabolism during stimulation               |
| $input_1 = k_{metabolic} \times stimulus$<br>$v_{ID} = k_{ID} \times input_{Delay}$                                                                                                                                                            | Delay state reactions                                           |
| $v_{toOFBD} = O_{2Dbody} \times glucose$<br>$v_{OFBD} = oxygen_{FBdelay} \times k_{OFBD}$<br>$v_{OFBD2} = oxygen_{FBdelay2} \times k_{OFBD2}$<br>$v_{OFBD3} = oxygen_{FBdelay3} \times k_{OFBD3}$<br>$v_{OEB} = oxygenfeedback \times k_{OEB}$ | Delay state reactions                                           |

### 1.1.2 Variables

| Variable name | Variable unit | Variable value                               | Interpretation                            |
|---------------|---------------|----------------------------------------------|-------------------------------------------|
| $k_{flow}$    | 1/s           | $\frac{k_{flow_{O_2}}}{km + oxygenfeedback}$ | Blood flow                                |
| $G_{body}$    | amount        | 100                                          | Glucose in arterial blood                 |
| $O_{2body}$   | amount        | 100                                          | Oxygen in arterial blood                  |
| $oHb_{body}$  | amount        | 100                                          | Oxygenated hemoglobin in arterial blood   |
| $dHb_{body}$  | amount        | 100                                          | Deoxygenated hemoglobin in arterial blood |
| $\hat{y}$     | unitless      | $\frac{k_y \times oHb}{dHb}$                 | Output signal                             |

### 1.1.3 Parameters and parameter values

Parameters and parameter values for the metabolic feedback model  $M_{m1}$  used in Fig. A.

| Parameter name  | Parameter unit             | Parameter value |
|-----------------|----------------------------|-----------------|
| $k_{1f}$        | 1/s                        | 14049.3847      |
| $k_{1b}$        | 1/(amount×s)               | 18645.2545      |
| $k_{basal}$     | 1/(amount×s)               | 0.5064          |
| $k_{flowO_2}$   | amount/s                   | 3.0207          |
| $k_y$           | unitless                   | 12514.7912      |
| $k_{metabolic}$ | 1/s                        | 1907.5170       |
| $k_m$           | amount                     | 604.8624        |
| proportion1     | oxygen/glucose metabolised | 0.9222          |
| proportion2     | oxygen/glucose metabolised | 0.1632          |
| $k_{ID}$        | 1/s                        | 6250.7308       |
| $O_{2Dbody}$    | 1/s                        | 29.8642         |
| $k_{OFBD}$      | 1/s                        | 5.5231          |
| $k_{OFBD2}$     | 1/s                        | 16208.1574      |
| $k_{OFBD3}$     | 1/s                        | 16.3427         |
| $k_{OFB}$       | 1/s                        | 3189.4025       |

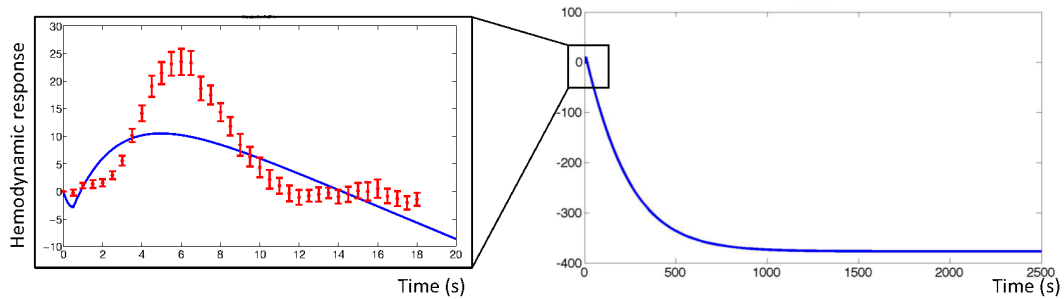

Fig A: Oxygen controls the feedback in the metabolic model  $M_{m1}$ . Red dots = data mean and SE, blue line = model simulation.

## 1.2 M<sub>m2</sub>

The metabolic model M<sub>m2</sub> assumes that the only mechanism that controls the shape of the BOLD response is that the blood vessels increase the blood flow in response to a lack of glucose during the stimulus.

### 1.2.1 States and reactions

| State                                                                                                                         | Interpretation                     | Steady State value p <sub>1</sub> | Steady State value p <sub>2</sub> | Steady State value p <sub>3</sub> |
|-------------------------------------------------------------------------------------------------------------------------------|------------------------------------|-----------------------------------|-----------------------------------|-----------------------------------|
| $\frac{d(stimulus)}{dt} = 0$                                                                                                  | Stimulus input signal              | 0                                 | 0                                 | 0                                 |
| $\frac{d(oHb)}{dt} = v_{1b} - v_{1f} + v_{inoHb} - v_{outoHb}$                                                                | Change in oxyhemoglobin level      | 107.10                            | 107.10                            | 107.1                             |
| $\frac{d(dHb)}{dt} = v_{1f} - v_{1b} + v_{indHb} - v_{outdHb}$                                                                | Change in deoxyhemoglobin level    | 92.90                             | 92.90                             | 92.9                              |
| $\frac{d(O_2)}{dt} = v_{1f} - v_{1b} - v_{basal} \times proportion_1 - v_{stim} \times proportion_2 + v_{inO_2} - v_{outO_2}$ | Change in oxygen level             | 0.52                              | 0.52                              | 0.52                              |
| $\frac{d(glucose)}{dt} = v_{inG} - v_{outG} - v_{basal} - v_{stim}$                                                           | Change in glucose level            | 29.80                             | 29.80                             | 29.8                              |
| $\frac{d(inputDelay_1)}{dt} = input_1 - v_{ID1}$                                                                              | Delay state                        | 4.65<br>$\times 10^{-20}$         | -1.52<br>$\times 10^{-17}$        | -2.08<br>$\times 10^{-18}$        |
| $\frac{d(inputDelay_2)}{dt} = v_{ID1} - v_{ID2}$                                                                              | Delay state                        | 4.63<br>$\times 10^{-20}$         | -1.51<br>$\times 10^{-17}$        | -2.07<br>$\times 10^{-18}$        |
| $\frac{d(inputDelay_3)}{dt} = v_{ID2} - v_{ID3}$                                                                              | Delay state                        | 4.70<br>$\times 10^{-20}$         | -1.54<br>$\times 10^{-17}$        | -2.1<br>$\times 10^{-18}$         |
| $\frac{d(inputDelay_4)}{dt} = v_{ID3} - v_{ID4}$                                                                              | Delay state                        | 4.59<br>$\times 10^{-20}$         | -1.50<br>$\times 10^{-17}$        | -2.05<br>$\times 10^{-18}$        |
| $\frac{d(inputDelay_5)}{dt} = v_{ID4} - v_{ID5}$                                                                              | Delay state                        | 1.66<br>$\times 10^{-23}$         | -5.41<br>$\times 10^{-21}$        | -7.4<br>$\times 10^{-22}$         |
| $\frac{d(glucoseFbDelay)}{dt} = v_{toGFBD} - v_{GFBD}$                                                                        | Delay state                        | 0.16                              | 0.16                              | 0.16                              |
| $\frac{d(glucosefeedback)}{dt} = v_{GFBD} - v_{GFB}$                                                                          | Glucose feedback to the blood flow | 0.25                              | 0.25                              | 0.25                              |



| Reaction                                                                                                                                                                         | Interpretation                                    |
|----------------------------------------------------------------------------------------------------------------------------------------------------------------------------------|---------------------------------------------------|
| $v_{inoHb} = oHb_{body} \times k_{flow}$<br>$v_{outoHb} = oHb \times k_{flow}$                                                                                                   | Oxyhemoglobin influx<br>Oxyhemoglobin outflux     |
| $v_{indHb} = dHb_{body} \times k_{flow}$<br>$v_{outdHb} = dHb \times k_{flow}$                                                                                                   | Deoxyhemoglobin influx<br>Deoxyhemoglobin outflux |
| $v_{inG} = G_{body} \times k_{flow}$<br>$v_{outG} = glucose \times k_{flow}$                                                                                                     | Glucose influx<br>Glucose outflux                 |
| $v_{inO_2} = O_{2body} \times k_{flow}$<br>$v_{outO_2} = O_2 \times k_{flow}$                                                                                                    | Oxygen influx<br>Oxygen outflux                   |
| $v_{basal} = k_{basal} \times O_2^{proportion_1} \times glucose$<br>$v_{stim} = input_{Delay5} \times O_2^{proportion_2} \times glucose \times k_{i2}$                           | Basal metabolism<br>Metabolism during stimulation |
| $input_1 = k_{metabolic} \times stimulus$<br>$v_{ID} = k_{ID} \times input_{Delay}$                                                                                              | Delay state reactions                             |
| $v_{toGFBD} = GD_{body} \times glucose$<br>$v_{GFBD} = glucose_{FBdelay} \times k_{GFBD}$<br>$v_{GFB} = glucose_{feedback} \times k_{GFB}$                                       | Delay state reactions                             |
| $v_{ID2} = input_{Delay2} \times k_{ID2}$<br>$v_{ID3} = input_{Delay3} \times k_{ID3}$<br>$v_{ID4} = input_{Delay4} \times k_{ID4}$<br>$v_{ID5} = input_{Delay5} \times k_{ID5}$ | Delay state reactions                             |

### 1.2.2 Variables

| Variable name | Variable unit | Variable value                                       | Interpretation                            |
|---------------|---------------|------------------------------------------------------|-------------------------------------------|
| $k_{flow}$    | 1/s           | $\frac{k_{flow}_{glucose}}{km + glucose_{feedback}}$ | Blood flow                                |
| $G_{body}$    | amount        | 100                                                  | Glucose in arterial blood                 |
| $GD_{body}$   | amount        | 100                                                  | Glucose feedback delay                    |
| $O_{2body}$   | amount        | 100                                                  | Oxygen in arterial blood                  |
| $oHb_{body}$  | amount        | 100                                                  | Oxygenated hemoglobin in arterial blood   |
| $dHb_{body}$  | amount        | 100                                                  | Deoxygenated hemoglobin in arterial blood |
| $\hat{y}$     | unitless      | $\frac{k_y \times oHb}{dHb}$                         | Output signal                             |

### 1.2.3 Parameters and parameter values

Parameter sets for model  $M_{m2}$  used in Fig. 5 B-D. Proportion1 and proportion2 (marked in bold) control the proportion of aerobic and anaerobic metabolism during basal conditions vs. during stimulation.

| Parameter names      | Parameter unit             | $p_1$<br>$(CMR_{O_2}/CMR_{glu})_{basal} = (CMR_{O_2}/CMR_{glu})_{stimuli}$ | $p_2$<br>$(CMR_{O_2})_{stimuli} = 0$ | $p_3$<br>$(CMR_{O_2}/CMR_{glu})_{basal} > (CMR_{O_2}/CMR_{glu})_{stimuli}$ |
|----------------------|----------------------------|----------------------------------------------------------------------------|--------------------------------------|----------------------------------------------------------------------------|
| $k_{1f}$             | 1/s                        | 627.1792                                                                   | 627.1792                             | 627.1792                                                                   |
| $k_{1b}$             | 1/(amount×s)               | 1381.9932                                                                  | 1381.9932                            | 1381.9932                                                                  |
| $k_{basal}$          | 1/(amount×s)               | 5.0587                                                                     | 5.0587                               | 5.0587                                                                     |
| $k_{flow_{glucose}}$ | amount/s                   | 102.6292                                                                   | 102.6292                             | 102.6292                                                                   |
| $k_y$                | unitless                   | 2905.5532                                                                  | 2905.5532                            | 2905.5532                                                                  |
| $k_{metabolic}$      | 1/s                        | 189.3795                                                                   | 189.3795                             | 189.3795                                                                   |
| $k_m$                | amount                     | 111.8459                                                                   | 111.8459                             | 111.8459                                                                   |
| $k_{i2}$             | 1/(amount <sup>2</sup> ×s) | 11.67404                                                                   | 11.67404                             | 11.67404                                                                   |
| proportion1          | oxygen/glucose metabolised | <b>1.3159</b>                                                              | <b>1.3159</b>                        | <b>1.3159</b>                                                              |
| proportion2          | oxygen/glucose metabolised | <b>1.3159</b>                                                              | <b>0</b>                             | <b>0.6304</b>                                                              |
| $k_{ID}$             | 1/s                        | 0.9575                                                                     | 0.9575                               | 0.9575                                                                     |
| $k_{GFBD}$           | 1/s                        | 18641.1377                                                                 | 18641.1377                           | 18641.1377                                                                 |
| $k_{GFB}$            | 1/s                        | 11921.2175                                                                 | 11921.2175                           | 11921.2175                                                                 |
| $k_{ID2}$            | 1/s                        | 0.9613                                                                     | 0.9613                               | 0.9613                                                                     |
| $k_{ID3}$            | 1/s                        | 0.9484                                                                     | 0.9484                               | 0.9484                                                                     |
| $k_{ID4}$            | 1/s                        | 0.9703                                                                     | 0.9703                               | 0.9703                                                                     |
| $k_{ID5}$            | 1/s                        | 2687.7052                                                                  | 2687.7052                            | 2687.7052                                                                  |

### 1.3 $M_{m3}$

The metabolic model  $M_{m3}$  assumes that the only mechanism that controls the shape of the BOLD response is that the blood vessels increase the blood flow in response to a lack of glucose during the stimulus. The delay states are placed in the glucose feedback, not between stimulus and metabolism.

#### 1.3.1 Interaction graph

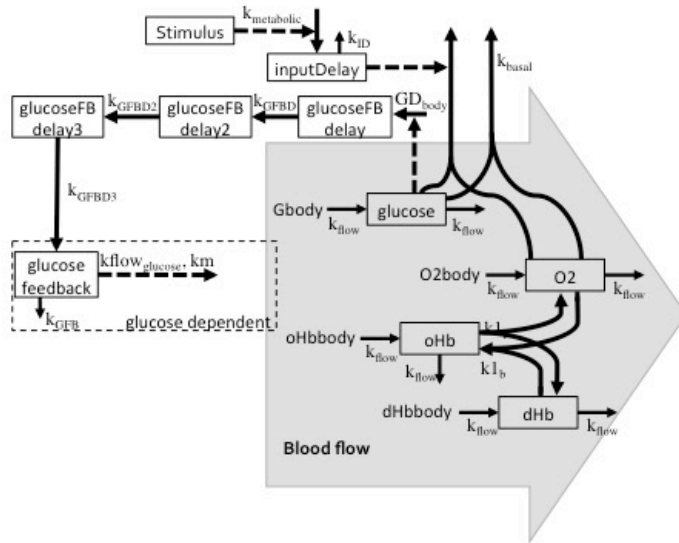

Fig. B: Interaction graph of the metabolic feedback model  $M_{m3}$ . Interaction graphs of the metabolic feedback model and the neurotransmitter feed-forward model.

Whole squares = states, dashed squares = variables (summed from states), whole arrows = transformations, dashed arrows = interactions, green area = astrocyte, blue area = neuron, grey area = blood. All states starting with S and a number are delay states. Stimulus is the input to the model. `Gbody`, `O2body`, `oHbbody`, `dHbbody`, and `PL` are variables. Stimulus = input signal. `oHb` and `dHb` are oxyhemoglobin and deoxyhemoglobin, respectively.

### 1.3.2 States and reactions

| State                                                                                                                                                                                                                                  | Interpretation                  | Steady State value<br>$p_4$ | Steady State value<br>$p_5$ |
|----------------------------------------------------------------------------------------------------------------------------------------------------------------------------------------------------------------------------------------|---------------------------------|-----------------------------|-----------------------------|
| $\frac{d(stimulus)}{dt} = 0$                                                                                                                                                                                                           | Stimulus input signal           | 0                           | 0                           |
| $\frac{d(oHb)}{dt} = v_{1_b} - v_{1_f} + v_{inoHb} - v_{outoHb}$                                                                                                                                                                       | Change in oxyhemoglobin level   | 1.84                        | 16.15                       |
| $\frac{d(dHb)}{dt} = v_{1_f} - v_{1_b} + v_{indHb} - v_{outdHb}$                                                                                                                                                                       | Change in deoxyhemoglobin level | 18.16                       | 3.85                        |
| $\frac{d(O_2)}{dt} = v_{1_f} - v_{1_b} - v_{basal} \times proportion_1 - v_{stim} \times proportion_2 + v_{inO_2} - v_{outO_2}$                                                                                                        | Change in oxygen level          | 0.12                        | 0.0018                      |
| $\frac{d(glucose)}{dt} = v_{inG} - v_{outG} - v_{basal} - v_{stim}$                                                                                                                                                                    | Change in glucose level         | 1.41                        | 5.60                        |
| $\frac{d(inputDelay)}{dt} = input_1 - v_{ID}$                                                                                                                                                                                          | Delay state                     | $-2.11 \times 10^{-14}$     | $-8.12 \times 10^{-15}$     |
| $\frac{d(glucoseFbDelay)}{dt} = v_{toGFBD} - v_{GFBD}$<br>$\frac{d(glucoseFbDelay_2)}{dt} = v_{GFBD} - v_{GFBD2}$<br>$\frac{d(glucoseFbDelay_3)}{dt} = v_{GFBD2} - v_{GFBD3}$<br>$\frac{d(glucosefeedback)}{dt} = v_{GFBD3} - v_{GFB}$ | Delay states                    | 0.18                        | 3897.12                     |

| Reaction                                                                                                                                                                                                                                                                                                                                      | Interpretation                                                                                                                                                                         |
|-----------------------------------------------------------------------------------------------------------------------------------------------------------------------------------------------------------------------------------------------------------------------------------------------------------------------------------------------|----------------------------------------------------------------------------------------------------------------------------------------------------------------------------------------|
| $v_{1f} = k_{1f} \times oHb$<br><br>$v_{1b} = k_{1b} \times dHb \times O_2$                                                                                                                                                                                                                                                                   | Rate of releasing oxyhemoglobin into oxygen and deoxyhemoglobin<br><br>Rate of binding oxygen and deoxyhemoglobin into oxyhemoglobin                                                   |
| $v_{inoHb} = oHb_{body} \times k_{flow}$<br>$v_{outoHb} = oHb \times k_{flow}$<br><br>$v_{indHb} = dHb_{body} \times k_{flow}$<br>$v_{outdHb} = dHb \times k_{flow}$<br><br>$v_{inG} = G_{body} \times k_{flow}$<br>$v_{outG} = glucose \times k_{flow}$<br><br>$v_{inO_2} = O_{2body} \times k_{flow}$<br>$v_{outO_2} = O_2 \times k_{flow}$ | Oxyhemoglobin influx<br>Oxyhemoglobin outflux<br><br>Deoxyhemoglobin influx<br>Deoxyhemoglobin outflux<br><br>Glucose influx<br>Glucose outflux<br><br>Oxygen influx<br>Oxygen outflux |
| $v_{basal} = k_{basal} \times O_2^{proportion_1} \times glucose$<br>$v_{stim} = inputDelay \times O_2^{proportion_2} \times glucose$                                                                                                                                                                                                          | Basal metabolism<br><br>Metabolism during stimulation                                                                                                                                  |
| $input_1 = k_{metabolic} \times stimulus$<br>$v_{ID} = k_{ID} \times input_{Delay}$                                                                                                                                                                                                                                                           | Delay state reactions                                                                                                                                                                  |
| $v_{toGFBD} = GD_{body} \times glucose$<br>$v_{GFBD} = glucose_{FBdelay} \times k_{GFBD}$<br>$v_{GFBD2} = glucose_{FBdelay2} \times k_{GFBD2}$<br>$v_{GFBD3} = glucose_{FBdelay3} \times k_{GFBD3}$<br>$v_{GFB} = glucose_{feedback} \times k_{GFB}$                                                                                          | Delay state reactions                                                                                                                                                                  |

### 1.3.3 Variables

| Variable name | Variable unit | Variable value                                       | Interpretation                            |
|---------------|---------------|------------------------------------------------------|-------------------------------------------|
| $k_{flow}$    | 1/s           | $\frac{k_{flow}_{glucose}}{km + glucose_{feedback}}$ | Blood flow                                |
| $G_{body}$    | amount        | 100                                                  | Glucose in arterial blood                 |
| $O_{2body}$   | amount        | 100                                                  | Oxygen in arterial blood                  |
| $oHb_{body}$  | amount        | 100                                                  | Oxygenated hemoglobin in arterial blood   |
| $dHb_{body}$  | amount        | 100                                                  | Deoxygenated hemoglobin in arterial blood |
| $\hat{y}$     | unitless      | $\frac{k_y \times oHb}{dHb}$                         | Output signal                             |

### 1.3.4 Parameters and parameter values

Parameter sets for model  $M_{m3}$  used in Fig. 5 G-J.

| <b>Parameter names</b>              | <b>Parameter unit</b>         | <b>p<sub>4</sub><br/>Only<br/>undershoot</b> | <b>p<sub>5</sub><br/>Only<br/>initial dip</b> |
|-------------------------------------|-------------------------------|----------------------------------------------|-----------------------------------------------|
| k <sub>1f</sub>                     | 1/s                           | 1.3952                                       | 8.8366                                        |
| k <sub>1b</sub>                     | 1/(amount×s)                  | 0.0011                                       | 19957.2824                                    |
| k <sub>basal</sub>                  | 1/(amount×s)                  | 174.5880                                     | 41.8601                                       |
| k <sub>flow<sub>glucose</sub></sub> | amount/s                      | 2438.7260                                    | 818.7605                                      |
| k <sub>y</sub>                      | unitless                      | 297.9752                                     | 2.7266                                        |
| k <sub>metabolic</sub>              | 1/s                           | 19943.3114                                   | 19852.9448                                    |
| k <sub>m</sub>                      | amount                        | 3.3201                                       | 0.1918                                        |
| proportion1                         | oxygen/glucose<br>metabolised | 2.1006                                       | 0.8738                                        |
| proportion2                         | oxygen/glucose<br>metabolised | 0.0011                                       | 0.1102                                        |
| k <sub>ID</sub>                     | 1/s                           | 7.0830                                       | 1.4594                                        |
| G <sub>D<sub>body</sub></sub>       | 1/s                           | 2603.4638                                    | 545.2871                                      |
| k <sub>GFBD</sub>                   | 1/s                           | 19932.2693                                   | 0.7838                                        |
| k <sub>GFBD2</sub>                  | 1/s                           | 0.6959                                       | 0.8452                                        |
| k <sub>GFBD3</sub>                  | 1/s                           | 0.6676                                       | 4916.7131                                     |
| k <sub>GFB</sub>                    | 1/s                           | 0.4752                                       | 0.8249                                        |

Cost: p<sub>4</sub> = 18.02, p<sub>5</sub> = 60.84.

## 2 The Neurotransmitter model $M_n$

### 2.1 $M_{n1}$

The neurotransmitter model  $M_{n1}$  assumes that the mechanism that controls the shape of the BOLD response is the vessel response to signaling substances released by neurons and astrocytes in response to a stimulus.

#### 2.1.1 Interaction graph

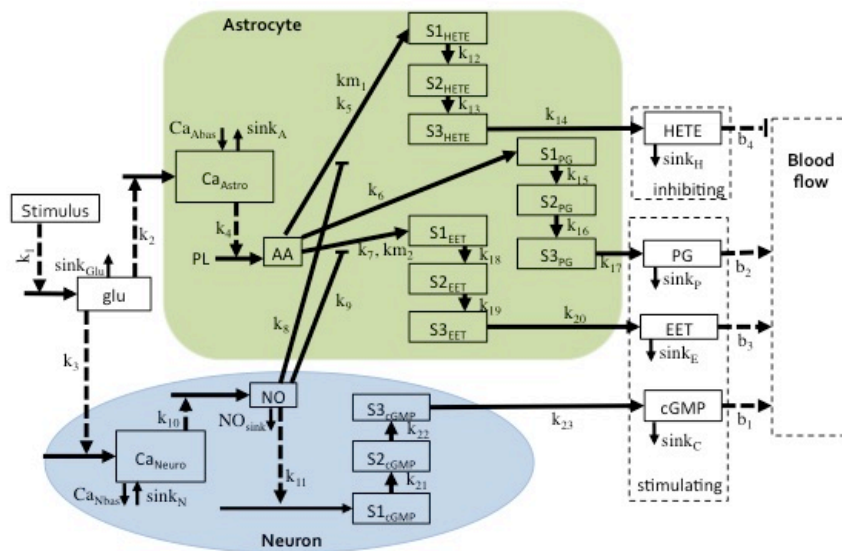

Fig. C: Interaction graph of the neurotransmitter feed-forward model. The neurotransmitter feed-forward hypothesis is described in more detail in Attwell 2010. Whole squares = states, dashed squares = variables (summed from states), whole arrows = transformations, dashed arrows = interactions, green area = astrocyte, blue area = neuron. All states starting with S and a number are delay states. Stimulus is the input to the model. Calcium neuron and calcium Astrocyte = calcium ion ( $Ca^{2+}$ ) level in the cell, NO = nitric oxide, cGMP = cyclic guanosine monophosphate, AA = arachidonic acid, EET = epoxyeicosatrienoic acids, PG = prostaglandins and HETE = hydroxyeicosatetraenoic acid (20-HETE).

## 2.1.2 States and reactions

| State                                                                    | Interpretation                                       | Steady State value<br><b>p<sub>6</sub></b> |
|--------------------------------------------------------------------------|------------------------------------------------------|--------------------------------------------|
| $\frac{d(Stimulus)}{dt} = 0$                                             | Stimulus input signal                                | 0                                          |
| $\frac{d(glu)}{dt} = in - glu_{sink}$                                    | Glutamate release in the synaptic cleft              | 0                                          |
| $\frac{d(Ca_{Astro})}{dt} = Glutamate_A - calcium_{Astro1} + Ca_{Abas}$  | Calcium influx in the astrocyte                      | 1.45                                       |
| $\frac{d(AA)}{dt} = calcium_{Astro2} - (AA_{HETE} + AA_{PG} + AA_{EET})$ | Change in AA level                                   | 768.92                                     |
| $\frac{d(Ca_{Neuro})}{dt} = Glutamate_N - calcium_{Neuro1} + Ca_{Nbas}$  | Calcium influx in the neuron                         | 0.78                                       |
| $\frac{d(NO)}{dt} = calcium_{Neuro2} - sink_{NO}$                        | Change in NO level                                   | 0.72                                       |
| $\frac{d(HETE)}{dt} = v3_{HETE} - HETE_{sink}$                           | HETE effecting the blood vessels<br><br>Delay states | 736.81                                     |
| $\frac{d(S1_{HETE})}{dt} = AA_{HETE} - v1_{HETE}$                        |                                                      | 237.40                                     |
| $\frac{d(S2_{HETE})}{dt} = v1_{HETE} - v2_{HETE}$                        |                                                      | 593.44                                     |
| $\frac{d(S3_{HETE})}{dt} = v2_{HETE} - v3_{HETE}$                        |                                                      | 293.89                                     |
| $\frac{d(PG)}{dt} = v3_{PG} - PG_{sink}$                                 | PG effecting the blood vessels<br><br>Delay states   | 740.05                                     |
| $\frac{d(S1_{PG})}{dt} = AA_{PG} - v1_{PG}$                              |                                                      | 708.47                                     |
| $\frac{d(S2_{PG})}{dt} = v1_{PG} - v2_{PG}$                              |                                                      | 729.05                                     |
| $\frac{d(S3_{PG})}{dt} = v2_{PG} - v3_{PG}$                              |                                                      | 723.29                                     |
| $\frac{d(EET)}{dt} = v3_{EET} - EET_{sink}$                              | EET effecting the blood vessels<br><br>Delay states  | 722.52                                     |
| $\frac{d(S1_{EET})}{dt} = AA_{EET} - v1_{EET}$                           |                                                      | 851.13                                     |
| $\frac{d(S2_{EET})}{dt} = v1_{EET} - v2_{EET}$                           |                                                      | 664.34                                     |
| $\frac{d(S3_{EET})}{dt} = v2_{EET} - v3_{EET}$                           |                                                      | 707.88                                     |
| $\frac{d(cGMP)}{dt} = v3_{cGMP} - cGMP_{sink}$                           | cGMP effecting the blood vessels<br><br>Delay states | 0.78                                       |
| $\frac{d(S1_{cGMP})}{dt} = AA_{cGMP} - v1_{cGMP}$                        |                                                      | 0.71                                       |
| $\frac{d(S2_{cGMP})}{dt} = v1_{cGMP} - v2_{cGMP}$                        |                                                      | 0.81                                       |
| $\frac{d(S3_{cGMP})}{dt} = v2_{cGMP} - v3_{cGMP}$                        |                                                      | 0.67                                       |



| Reactions                                                                                                                                                     | Interpretation                                                                            |
|---------------------------------------------------------------------------------------------------------------------------------------------------------------|-------------------------------------------------------------------------------------------|
| $in = k_1 \times Stimulus$<br>$glu_{sink} = glu \times sink_{Glu}$                                                                                            | Stimulus input<br>Glucose breakdown and reuptake                                          |
| $Glutamate_A = k_2 \times glu$<br>$calcium_{Astro1} = Ca_{Astro} \times sink_A$<br>$calcium_{Astro2} = PL \times Ca_{Astro} \times k_4$                       | Calcium influx in the astrocyte<br>Calcium outflux in the astrocyte<br>Calcium induced AA |
| $AA_{HETE} = k_5 \times \frac{AA}{(km_1 + k_8 \times NO)}$<br>$AA_{PG} = k_6 \times AA$<br>$AA_{EET} = k_7 \times \frac{AA}{(km_2 + k_9 \times NO)}$          | AA turning into HETE<br>AA turning into PG<br>AA turning into EET                         |
| $Glutamate_N = k_3 \times glu$<br>$calcium_{Neuro1} = Ca_{Neuro} \times sink_N$<br>$calcium_{Neuro2} = k_{10} \times Ca_{Neuro}$                              | Calcium influx in the neuron<br>Calcium outflux in the neuron<br>Calcium induced NO       |
| $NO_{cGMP} = k_{11} \times NO$<br>$sink_{NO} = NO_{sink} \times NO$                                                                                           | NO induced cGMP<br>NO breakdown                                                           |
| $v1_{HETE} = k_{12} \times S1_{HETE}$<br>$v2_{HETE} = k_{13} \times S2_{HETE}$<br>$v3_{HETE} = k_{14} \times S3_{HETE}$<br>$HETE_{sink} = HETE \times sink_H$ | Delay state reactions<br>HETE breakdown                                                   |
| $v1_{PG} = k_{15} \times S1_{PG}$<br>$v2_{PG} = k_{16} \times S2_{PG}$<br>$v3_{PG} = k_{17} \times S3_{PG}$<br>$PG_{sink} = PG \times sink_P$                 | Delay state reactions<br>PG breakdown                                                     |
| $v1_{EET} = k_{18} \times S1_{EET}$<br>$v2_{EET} = k_{19} \times S2_{EET}$<br>$v3_{EET} = k_{20} \times S3_{EET}$<br>$EET_{sink} = EET \times sink_E$         | Delay state reactions<br>EET breakdown                                                    |
| $v1_{cGMP} = k_{21} \times S1_{cGMP}$<br>$v2_{cGMP} = k_{22} \times S2_{cGMP}$<br>$v3_{cGMP} = k_{23} \times S3_{cGMP}$<br>$cGMP_{sink} = cGMP \times sink_c$ | Delay state reactions<br>cGMP breakdown                                                   |

### 2.1.3 Variables

| Variable name | Variable unit | Variable value                                                       |
|---------------|---------------|----------------------------------------------------------------------|
| Stimulating   | unitless      | $b_1 \times cGMP + b_2 \times PG + b_3 \times EET$                   |
| Inhibiting    | unitless      | $b_4 \times HETE$                                                    |
| $\hat{y}$     | unitless      | $b_1 \times cGMP + b_2 \times PG + b_3 \times EET - b_4 \times HETE$ |

### 2.1.4 Parameters and parameter values

Parameter sets for model  $M_{n1}$  used in Fig. 6A.

| Parameter name | Parameter unit | Parameter Value<br>$p_6$ |
|----------------|----------------|--------------------------|
| $k_1$          | 1/s            | 0.5589                   |
| $k_2$          | 1/s            | 0.053036                 |
| $k_3$          | 1/s            | 3.3634                   |
| $k_4$          | 1/(amount×s)   | 1.6775                   |
| $k_5$          | amount/s       | 0.43467                  |
| $k_6$          | 1/s            | $5.892 \times 10^7$      |
| $k_7$          | amount/s       | 1.7891                   |
| $k_8$          | unitless       | 1.0276                   |
| $k_9$          | unitless       | 2.8976                   |
| $k_{10}$       | 1/s            | 1.0993                   |
| $k_{11}$       | 1/s            | $4.8221 \times 10^5$     |
| $k_{12}$       | 1/s            | $6.3353 \times 10^8$     |
| $k_{13}$       | 1/s            | 0.87781                  |
| $k_{14}$       | 1/s            | 1.0343                   |
| $k_{15}$       | 1/s            | 2.1986                   |
| $k_{16}$       | 1/s            | 0.8836                   |
| $k_{17}$       | 1/s            | 1.2209                   |
| $k_{18}$       | 1/s            | 0.6518                   |
| $k_{19}$       | 1/s            | 0.9190                   |
| $k_{20}$       | 1/s            | $7.5887 \times 10^7$     |
| $k_{21}$       | 1/s            | 2.5067                   |
| $k_{22}$       | 1/s            | 1.7921                   |
| $k_{23}$       | 1/s            | $1.5562 \times 10^5$     |
| $km_1$         | amount         | $5.5066 \times 10^6$     |
| $km_2$         | amount         | 0.0433                   |
| $b_1$          | 1/amount       | 2.7762                   |
| $b_2$          | 1/amount       | 1.299                    |
| $b_3$          | 1/amount       | 0.8634                   |
| $b_4$          | 1/amount       | $1.0201 \times 10^7$     |
| $Ca_{Abas}$    | amount/s       | $3.3823 \times 10^7$     |
| $Ca_{Nbas}$    | amount/s       | 1.4943                   |
| $sink_{Glu}$   | 1/s            | 0.5318                   |
| $sink_A$       | 1/s            | 1.3426                   |
| $sink_N$       | 1/s            | 0.9493                   |
| $sink_H$       | 1/s            | $5.7961 \times 10^7$     |
| $sink_P$       | 1/s            | 0.9134                   |

|                           |          |                      |
|---------------------------|----------|----------------------|
| $\text{sink}_E$           | 1/s      | 0.7554               |
| $\text{sink}_c$           | 1/s      | $6.7692 \times 10^5$ |
| $\text{NO}_{\text{sink}}$ | 1/s      | 1.0735               |
| PL                        | amount/s | 945.52               |

Cost: 5.76.

## 2.2 $M_{n2}$

Minimized version of the neurotransmitter model  $M_{n1}$ . The main mechanism is the balance between the vasoconstricting and the vasodilating arm of the model structure.

The states, variables and parameters of this model do not have a biological interpretation.

### 2.2.1 Interaction graph

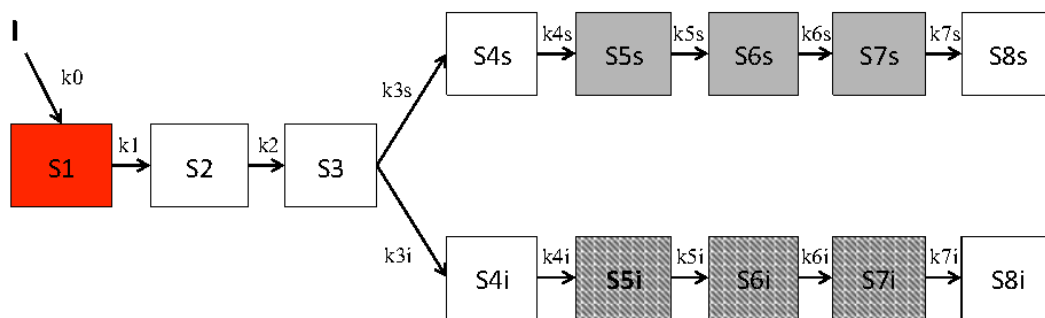

Fig. D. Interaction graph of the minimized neurotransmitter feed-forward model. Filled grey squares = vasodilation states, checkedered grey squares = vasoconstriction states.

### 2.2.2 Fit to data

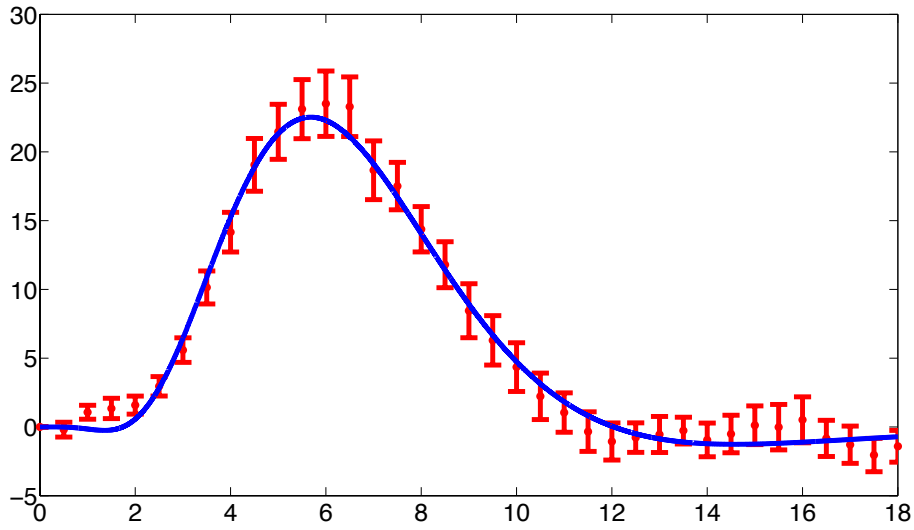

Fig E: Fit of the minimal model  $M_{n2}$  to data. Red dots = data mean and SE, blue line = model simulation.

### 2.2.3 States and reactions

| State equation                                                   | Steady State values<br>best fit intensity experiment |
|------------------------------------------------------------------|------------------------------------------------------|
| $\frac{d(I)}{dt} = 0$                                            | $3.86 \times 10^{-21}$                               |
| $\frac{d(S1)}{dt} = I \times k_0 - S1 \times k_1$                | $-1.88 \times 10^{-14}$                              |
| $\frac{d(S2)}{dt} = S1 \times k_1 - S2 \times k_2$               | $-3.71 \times 10^{-14}$                              |
| $\frac{d(S3)}{dt} = S2 \times k_2 - S3 \times (k_{3s} + k_{3i})$ | $-2.30 \times 10^{-14}$                              |
| $\frac{d(S4_s)}{dt} = S3 \times k_{3s} - S4 \times k_{4s}$       | $-2.54 \times 10^{-13}$                              |
| $\frac{d(S5_s)}{dt} = S4 \times k_{4s} - S5 \times k_{5s}$       | $-3.75 \times 10^{-13}$                              |
| $\frac{d(S6_s)}{dt} = S5 \times k_{5s} - S6 \times k_{6s}$       | $-2.10 \times 10^{-16}$                              |
| $\frac{d(S7_s)}{dt} = S6 \times k_{6s} - S7 \times k_{7s}$       | $-1.42 \times 10^{-12}$                              |
| $\frac{d(S8_s)}{dt} = S7_s \times k_{7s}$                        | 0.57                                                 |
| $\frac{d(S4_i)}{dt} = S3 \times k_{3i} - S4 \times k_{4i}$       | $-4.93 \times 10^{-14}$                              |
| $\frac{d(S5_i)}{dt} = S4 \times k_{4i} - S5 \times k_{5i}$       | $2.46 \times 10^{-12}$                               |
| $\frac{d(S6_i)}{dt} = S5 \times k_{5i} - S6 \times k_{6i}$       | $5.29 \times 10^{-13}$                               |
| $\frac{d(S7_i)}{dt} = S6 \times k_{6i} - S7 \times k_{7i}$       | $6.25 \times 10^{-18}$                               |
| $\frac{d(S8_i)}{dt} = S7_i \times k_{7i}$                        | 0.43                                                 |

## 2.2.4 Variables

| Variable name | Variable unit | Variable value                                         |
|---------------|---------------|--------------------------------------------------------|
| Stimulating   | unitless      | $S5_s + S6_s + S7_s$                                   |
| Inhibitory    | unitless      | $S5_i + S6_i + S7_i$                                   |
| $\hat{y}$     | unitless      | $k_y \times (S5_s - S5_i + S6_s - S6_i + S7_s - S7_i)$ |

## 2.2.5 Parameters and parameter values

Parameter sets for model  $M_{n2}$  used in Fig. D.

| Parameter names | Parameter unit | Parameter values best fit intensity experiment |
|-----------------|----------------|------------------------------------------------|
| $k_y$           | unitless       | 13467                                          |
| $k_0$           | 1/s            | 0.1034                                         |
| $k_1$           | 1/s            | 0.6245                                         |
| $k_2$           | 1/s            | 0.9430                                         |
| $k_{3s}$        | 1/s            | 1.2261                                         |
| $k_{4s}$        | 1/s            | 0.7059                                         |
| $k_{5s}$        | 1/s            | 1.0579                                         |
| $k_{6s}$        | 1/s            | 1889.7                                         |
| $k_{7s}$        | 1/s            | 0.7730                                         |
| $k_{3i}$        | 1/s            | 0.9163                                         |
| $k_{4i}$        | 1/s            | 1.0627                                         |
| $k_{5i}$        | 1/s            | 0.4454                                         |
| $k_{6i}$        | 1/s            | 2.5427                                         |
| $k_{7i}$        | 1/s            | 0.000021531                                    |

Cost: 29.2.

### 3 The feed-forward with metabolism model $M_{nm}$

#### 3.1 $M_{nm1}$ Model structure

The combined model  $M_{nm1}$  is a merge between the metabolic model  $M_{m3}$  and the neurotransmitter model  $M_{n1}$ . It assumes that the vessel response to signaling substances released by neurons and astrocytes in response to a stimulus controls the blood flow. The metabolism controls the balance of dHb and oHb. Therefore, both the metabolism and the intracellular signaling controls the shape of the BOLD response. The metabolism of  $O_2$  is the main mechanism behind the initial dip while the blood flow controls the peak and the post-peak undershoot.

##### 3.1.1 Interactiongraph

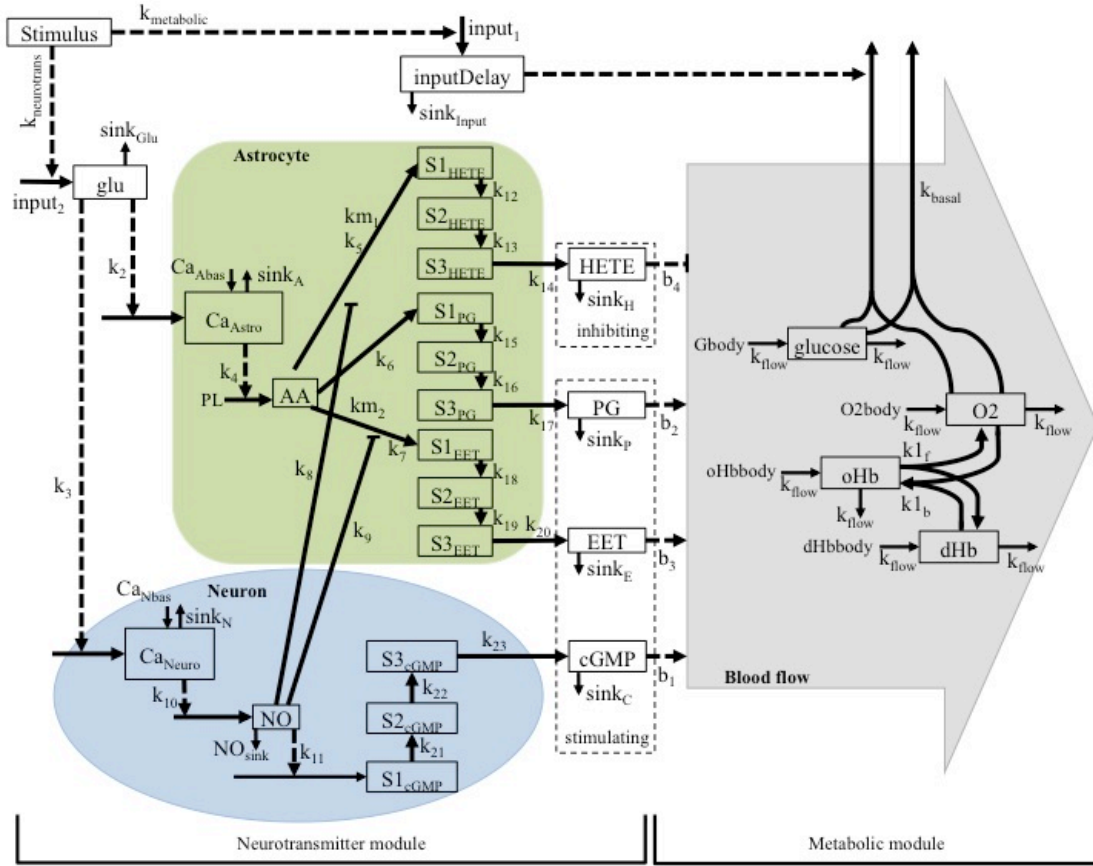

Fig. F: Interaction graph of the combined model  $M_{nm1}$ . All abbreviations and names as declared above.

### 3.1.2 States and reactions

| State                                                                                                                                                                                                         | Interpretation                                       | Steady State value<br>$p_7$      | Steady State value<br>$p_9$      |
|---------------------------------------------------------------------------------------------------------------------------------------------------------------------------------------------------------------|------------------------------------------------------|----------------------------------|----------------------------------|
| $\frac{d(stimulus)}{dt} = 0$                                                                                                                                                                                  | Stimulus input signal                                | 0                                | 0                                |
| $\frac{d(oHb)}{dt} = v1_b - v1_f + v_{inoHb} - v_{outoHb}$                                                                                                                                                    | Change in oxyhemoglobin level                        | 5.54                             | 7.21                             |
| $\frac{d(dHb)}{dt} = v1_f - v1_b + v_{indHb} - v_{outdHb}$                                                                                                                                                    | Change in deoxyhemoglobin level                      | 14.45                            | 12.79                            |
| $\frac{d(O_2)}{dt} = v1_f - v1_b - v_{basal} \times proportion_1 - v_{stim} \times proportion_2 + v_{inO_2} - v_{outO_2}$                                                                                     | Change in oxygen level                               | 0.8                              | 1.26                             |
| $\frac{d(glucose)}{dt} = v_{inG} - v_{outG} - v_{basal} - v_{stim}$                                                                                                                                           | Change in glucose level                              | 6.85                             | 8.66                             |
| $\frac{d(inputDelay)}{dt} = input_1 - v_{ID}$                                                                                                                                                                 | Delay state                                          | $5.54 \times 10^{-17}$           | $7.85 \times 10^{-18}$           |
| $\frac{d(glu)}{dt} = input_2 - glu_{sink}$                                                                                                                                                                    | Glutamate release in the synaptic cleft              | $1.54 \times 10^{-17}$           | $6.08 \times 10^{-19}$           |
| $\frac{d(Ca_{Astro})}{dt} = Glutamate_A - calcium_{Astro1} + Ca_{Abas}$                                                                                                                                       | Calcium influx in the astrocyte                      | 8.67                             | 2.15                             |
| $\frac{d(AA)}{dt} = calcium_{Astro2} - (AA_{HETE} + AA_{PG} + AA_{EET})$                                                                                                                                      | Change in AA level                                   | 1433.15                          | 36.56                            |
| $\frac{d(Ca_{Neuro})}{dt} = Glutamate_N - calcium_{Neuro1} + Ca_{Nbas}$                                                                                                                                       | Calcium influx in the neuron                         | 2885.39                          | 2.52                             |
| $\frac{d(NO)}{dt} = calcium_{Neuro2} - sink_{NO}$                                                                                                                                                             | Change in NO level                                   | 127.69                           | 0.09                             |
| $\frac{d(HETE)}{dt} = v3_{HETE} - HETE_{sink}$<br>$\frac{d(S1_{HETE})}{dt} = AA_{HETE} - v1_{HETE}$<br>$\frac{d(S2_{HETE})}{dt} = v1_{HETE} - v2_{HETE}$<br>$\frac{d(S3_{HETE})}{dt} = v2_{HETE} - v3_{HETE}$ | HETE effecting the blood vessels<br><br>Delay states | 81.99<br>1.084<br>95.37<br>58.49 | 38.65<br>25.23<br>41.52<br>32.79 |
| $\frac{d(PG)}{dt} = v3_{PG} - PG_{sink}$<br>$\frac{d(S1_{PG})}{dt} = AA_{PG} - v1_{PG}$<br>$\frac{d(S2_{PG})}{dt} = v1_{PG} - v2_{PG}$<br>$\frac{d(S3_{PG})}{dt} = v2_{PG} - v3_{PG}$                         | PG effecting the blood vessels<br><br>Delay states   | 0.06<br>2.62<br>0.37<br>0.084    | 0.33<br>1.77<br>0.39<br>1.49     |

|                                                   |                                  |       |       |
|---------------------------------------------------|----------------------------------|-------|-------|
| $\frac{d(EET)}{dt} = v3_{EET} - EET_{sink}$       | EET effecting the blood vessels  | 31.99 | 21.10 |
| $\frac{d(S1_{EET})}{dt} = AA_{EET} - v1_{EET}$    |                                  | 39.64 | 41.98 |
| $\frac{d(S2_{EET})}{dt} = v1_{EET} - v2_{EET}$    | Delay states                     | 34.05 | 18.74 |
| $\frac{d(S3_{EET})}{dt} = v2_{EET} - v3_{EET}$    |                                  | 31.84 | 28.36 |
| $\frac{d(cGMP)}{dt} = v3_{cGMP} - cGMP_{sink}$    | cGMP effecting the blood vessels | 15.28 | 0.001 |
| $\frac{d(S1_{cGMP})}{dt} = AA_{cGMP} - v1_{cGMP}$ |                                  | 2.14  | 0.01  |
| $\frac{d(S2_{cGMP})}{dt} = v1_{cGMP} - v2_{cGMP}$ | Delay states                     | 0.47  | 0.07  |
| $\frac{d(S3_{cGMP})}{dt} = v2_{cGMP} - v3_{cGMP}$ |                                  | 1.39  | 0.02  |



| Reactions                                                                                                                                                                                                                                                                                                                                     | Interpretation                                                                                                                                                                         |
|-----------------------------------------------------------------------------------------------------------------------------------------------------------------------------------------------------------------------------------------------------------------------------------------------------------------------------------------------|----------------------------------------------------------------------------------------------------------------------------------------------------------------------------------------|
| $v_{1f} = k_{1f} \times oHb$<br><br>$v_{1b} = k_{1b} \times dHb \times O_2$                                                                                                                                                                                                                                                                   | Rate of releasing oxyhemoglobin into oxygen and deoxyhemoglobin<br><br>Rate of binding oxygen and deoxyhemoglobin into oxyhemoglobin                                                   |
| $v_{inoHb} = oHb_{body} \times k_{flow}$<br>$v_{outoHb} = oHb \times k_{flow}$<br><br>$v_{indHb} = dHb_{body} \times k_{flow}$<br>$v_{outdHb} = dHb \times k_{flow}$<br><br>$v_{inG} = G_{body} \times k_{flow}$<br>$v_{outG} = glucose \times k_{flow}$<br><br>$v_{inO_2} = O_{2body} \times k_{flow}$<br>$v_{outO_2} = O_2 \times k_{flow}$ | Oxyhemoglobin influx<br>Oxyhemoglobin outflux<br><br>Deoxyhemoglobin influx<br>Deoxyhemoglobin outflux<br><br>Glucose influx<br>Glucose outflux<br><br>Oxygen influx<br>Oxygen outflux |
| $v_{basal} = k_{basal} \times O_2^{proportion_1} \times glucose$<br>$v_{stim} = input_{Delay} \times O_2^{proportion_2} \times glucose$                                                                                                                                                                                                       | Basal metabolism<br>Metabolism during stimulation                                                                                                                                      |
| $input_1 = k_{metabolic} \times stimulus$<br>$v_{ID} = sink_{Input} \times input_{Delay}$                                                                                                                                                                                                                                                     | Stimulus input to the metabolic module<br>Delay state reaction                                                                                                                         |
| $input_2 = k_{neurotrans} \times stimulus$<br><br>$glu_{sink} = sink_{Glu} \times glu$                                                                                                                                                                                                                                                        | Stimulus input to the neurotransmitter module<br>Glucose breakdown and reuptake                                                                                                        |
| $Glutamate_A = k_2 \times glu$<br>$calcium_{Astro1} = Ca_{Astro} \times sink_A$<br>$calcium_{Astro2} = PL \times Ca_{Astro} \times k_4$                                                                                                                                                                                                       | Calcium influx in the astrocyte<br>Calcium outflux in the astrocyte<br>Calcium induced AA                                                                                              |
| $AA_{HETE} = k_5 \times \frac{AA}{(km_1 + k_8 \times NO)}$<br>$AA_{PG} = k_6 \times AA$<br>$AA_{EET} = k_7 \times \frac{AA}{(km_2 + k_9 \times NO)}$                                                                                                                                                                                          | AA turning into HETE<br><br>AA turning into PG<br><br>AA turning into EET                                                                                                              |
| $Glutamate_N = k_3 \times glu$<br>$calcium_{Neuro1} = Ca_{Neuro} \times sink_N$<br>$calcium_{Neuro2} = k_{10} \times Ca_{Neuro}$                                                                                                                                                                                                              | Calcium influx in the neuron<br>Calcium outflux in the neuron<br>Calcium induced NO                                                                                                    |
| $NO_{cGMP} = k_{11} \times NO$<br>$sink_{NO} = NO_{sink} \times NO$                                                                                                                                                                                                                                                                           | NO induced cGMP<br>NO breakdown                                                                                                                                                        |
| $v_{1HETE} = k_{12} \times S_{1HETE}$<br>$v_{2HETE} = k_{13} \times S_{2HETE}$<br>$v_{3HETE} = k_{14} \times S_{3HETE}$<br>$HETE_{sink} = HETE \times sink_H$                                                                                                                                                                                 | Delay state reactions<br><br>HETE breakdown                                                                                                                                            |
| $v_{1PG} = k_{15} \times S_{1PG}$<br>$v_{2PG} = k_{16} \times S_{2PG}$<br>$v_{3PG} = k_{17} \times S_{3PG}$<br>$PG_{sink} = PG \times sink_P$                                                                                                                                                                                                 | Delay state reactions<br><br>PG breakdown                                                                                                                                              |
| $v_{1EET} = k_{18} \times S_{1EET}$<br>$v_{2EET} = k_{19} \times S_{2EET}$                                                                                                                                                                                                                                                                    | Delay state reactions                                                                                                                                                                  |

|                                                                                                                                                               |                                             |
|---------------------------------------------------------------------------------------------------------------------------------------------------------------|---------------------------------------------|
| $v3_{EET} = k_{20} \times S3_{EET}$<br>$EET_{sink} = EET \times sink_E$                                                                                       | EET breakdown                               |
| $v1_{cGMP} = k_{21} \times S1_{cGMP}$<br>$v2_{cGMP} = k_{22} \times S2_{cGMP}$<br>$v3_{cGMP} = k_{23} \times S3_{cGMP}$<br>$cGMP_{sink} = cGMP \times sink_c$ | Delay state reactions<br><br>cGMP breakdown |

### 3.1.3 Variables

| Variable name | Variable unit | Variable value                                                       | Interpretation                            |
|---------------|---------------|----------------------------------------------------------------------|-------------------------------------------|
| $k_{flow}$    | 1/s           | $k_{flow}_{glucose}$<br>+ <i>stimulating</i><br>- <i>inhibiting</i>  | Blood flow                                |
| $G_{body}$    | amount        | 10                                                                   | Glucose in arterial blood                 |
| $O_{2body}$   | amount        | 10                                                                   | Oxygen in arterial blood                  |
| $oHb_{body}$  | amount        | 10                                                                   | Oxygenated hemoglobin in arterial blood   |
| $dHb_{body}$  | amount        | 10                                                                   | Deoxygenated hemoglobin in arterial blood |
| Stimulating   | 1/s           | $b_1 \times cGMP + b_2 \times PG + b_3 \times EET$                   | Vasodilation                              |
| Inhibiting    | 1/s           | $b_4 \times HETE$                                                    | Vasoconstriction                          |
| Act           | 1/s           | $b_1 \times cGMP + b_2 \times PG + b_3 \times EET - b_4 \times HETE$ | Signal substance effect on blood flow     |
| $\hat{y}$     | unitless      | $\frac{k_y \times oHb}{dHb}$                                         | Output signal                             |

### 3.1.4 Parameters and parameter values

Parameter sets for model  $M_{nm1}$  used in Fig. 8, Fig. 9 and Fig. 10.

| Parameter names                    | Parameter unit             | p7 best opt intensity data | p9 best opt frequency data |
|------------------------------------|----------------------------|----------------------------|----------------------------|
| $k_y$                              | amount/s                   | 1223.4987                  | 508.4496                   |
| $k_{\text{metabolic}}$             | 1/s                        | 114.7037                   | 1153.8404                  |
| $k_{\text{neurotrans}}$            | 1/s                        | 1104.2209                  | 116.0994                   |
| $k_{1f}$                           | 1/s                        | 177.3318                   | 1174.2658                  |
| $k_{1b}$                           | 1/(amount×s)               | 1122.5565                  | 194.4418                   |
| $k_{\text{basal}}$                 | 1/(amount×s)               | 91.3332                    | 1381.4508                  |
| $k_{\text{flow}_{\text{glucose}}}$ | 1/s                        | 4.3346                     | 117.9462                   |
| proportion1                        | oxygen/glucose metabolised | 2.4188                     | 5.6257                     |
| proportion2                        | oxygen/glucose metabolised | 4.5876                     | 2.6729                     |
| $\text{sink}_{\text{Input}}$       | 1/s                        | 1.1802                     | 4.6492                     |
| $k_2$                              | 1/s                        | 7.3947                     | 1.1401                     |
| $k_3$                              | 1/s                        | 4.1432                     | 3.7141                     |
| $k_4$                              | 1/(amount×s)               | 2.0084                     | 4.0534                     |
| $k_5$                              | amount/s                   | 0.8885                     | 2.1437                     |
| $k_6$                              | 1/s                        | 3.5817                     | 0.9628                     |
| $k_7$                              | amount/s                   | 0.3491                     | 3.7232                     |
| $k_8$                              | unitless                   | 1.0228                     | 0.3676                     |
| $k_9$                              | unitless                   | 0.1718                     | 1.0583                     |
| $k_{10}$                           | 1/s                        | 5.8839                     | 0.1795                     |
| $k_{11}$                           | 1/s                        | 49.7049                    | 6.1628                     |
| $k_{12}$                           | 1/s                        | 0.5647                     | 118.5220                   |
| $k_{13}$                           | 1/s                        | 0.9208                     | 0.6189                     |
| $k_{14}$                           | 1/s                        | 485.3883                   | 1.0366                     |
| $k_{15}$                           | 1/s                        | 3481.4269                  | 583.7653                   |
| $k_{16}$                           | 1/s                        | 15170.2739                 | 1937.3654                  |
| $k_{17}$                           | 1/s                        | 0.9036                     | 10982.2259                 |
| $k_{18}$                           | 1/s                        | 1.0520                     | 0.9339                     |
| $k_{19}$                           | 1/s                        | 1.1249                     | 1.1366                     |
| $k_{20}$                           | 1/s                        | 350.7833                   | 1.1654                     |
| $k_{21}$                           | 1/s                        | 1609.9603                  | 592.9449                   |
| $k_{22}$                           | 1/s                        | 538.4678                   | 1805.0249                  |
| $k_{23}$                           | 1/s                        | 8.8579                     | 555.2464                   |
| $km_1$                             | amount                     | 12.7144                    | 9.2642                     |
| $km_2$                             | amount                     | 7.8886                     | 14.4421                    |
| $Ca_{\text{Abas}}$                 | amount/s                   | 9279.9419                  | 8.2545                     |
| $Ca_{\text{Nbas}}$                 | amount/s                   | 1.5455                     | 9828.1976                  |
| $\text{sink}_{\text{Glu}}$         | 1/s                        | 0.9103                     | 1.6419                     |

|                           |              |            |            |
|---------------------------|--------------|------------|------------|
| $\text{sink}_A$           | 1/s          | 3.2162     | 0.8607     |
| $\text{sink}_N$           | 1/s          | 0.6568     | 3.4898     |
| $\text{sink}_H$           | 1/s          | 19985.5644 | 0.6677     |
| $\text{sink}_P$           | 1/s          | 1.1195     | 19830.1832 |
| $\text{sink}_E$           | 1/s          | 49.1725    | 1.1691     |
| $\text{sink}_c$           | 1/s          | 3.8819     | 54.3174    |
| $\text{NO}_{\text{sink}}$ | 1/s          | 37.9614    | 4.0331     |
| PL                        | amount       | 40.8202    | 38.1518    |
| $b_1$                     | 1/(amount×s) | 16.5399    | 40.5355    |
| $b_2$                     | 1/(amount×s) | 18.6399    | 20.9122    |
| $b_3$                     | 1/(amount×s) | 4.8399     | 19.3131    |
| $b_4$                     | 1/(amount×s) | 1223.4987  | 5.0147     |

Cost:  $p_7 = 7.17$ ,  $p_9 = 11.24$ .

### 3.1.5 Glucose metabolism in the model $M_{nm1}$

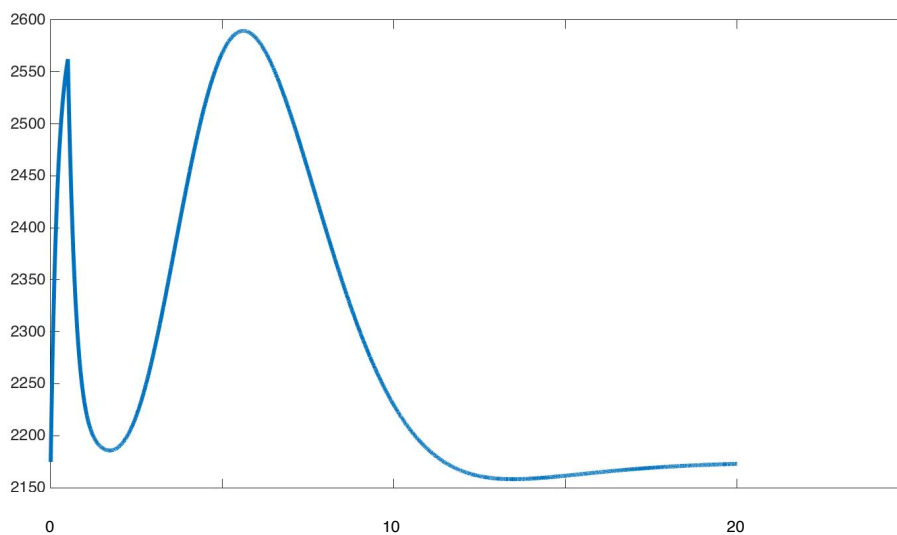

Figure G: Simulated glucose metabolism in the model  $M_{nm1}$ .

### 3.2 $M_{nm2}$ Model structure

$M_{nm1}$  is a minimized version of the model structure  $M_{nm1}$ .

#### 3.2.1 Interactiongraph

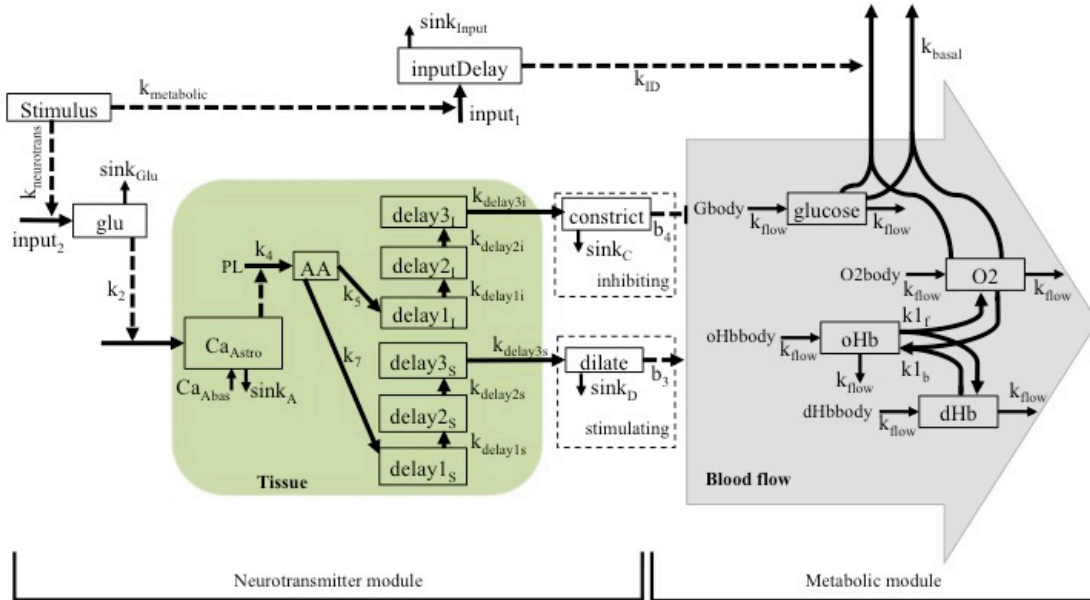

Fig. H: Interaction graph of the final model structure  $M_{nm2}$ . The model structure has two modules: the neurotransmitter module, which controls the blood flow, and the metabolic module, which controls the oxygen and glucose metabolism. Whole squares = states, dashed squares = variables (dependent on states), whole arrows = transformations, dashed arrows = interactions, green area = astrocyte, blue area = neuron, grey area = blood. All states starting with "delay" and a number (e.g delay2<sub>s</sub>) are delay states. Stimulus is the input to the model. Stimulus = input signal. oHb and dHb are oxyhemoglobin and deoxyhemoglobin, respectively. Glu = glucose, Calcium neuron and calcium astrocyte = calcium ion ( $Ca^{2+}$ ) level in the cell, AA = arachidonic acid. All terms starting with k (e.g k1), are parameters and in most cases represent rate constants. PL is a parameter representing phospholipase  $A_2$ , which is present in abundance. Gbody, O2body, oHbbody and dHbbody, are variables representing the glucose, oxygen and hemoglobin delivered into the area. "Constrict" and "dilate" are states representing the vasoactive substances which control the blood flow.

### 3.2.2 States and reactions

| State                                                                                                                     | Interpretation                          | Steady state value: p8<br>best opt intensity | Steady state value: p10<br>best opt frequency |
|---------------------------------------------------------------------------------------------------------------------------|-----------------------------------------|----------------------------------------------|-----------------------------------------------|
| $\frac{d(stimulus)}{dt} = 0$                                                                                              | Stimulus input signal                   | 1                                            | 1                                             |
| $\frac{d(oHb)}{dt} = v1_b - v1_f + v_{inoHb} - v_{outoHb}$                                                                | Change in oxyhemoglobin level           | 3.76                                         | 3.28                                          |
| $\frac{d(dHb)}{dt} = v1_f - v1_b + v_{indHb} - v_{outdHb}$                                                                | Change in deoxyhemoglobin level         | 16.24                                        | 16.72                                         |
| $\frac{d(O_2)}{dt} = v1_f - v1_b - v_{basal} \times proportion_1 - v_{stim} \times proportion_2 + v_{inO_2} - v_{outO_2}$ | Change in oxygen level                  | 0.77                                         | 0.71                                          |
| $\frac{d(glucose)}{dt} = v_{inG} - v_{outG} - v_{basal} - v_{stim}$                                                       | Change in glucose level                 | 8.19                                         | 8.14                                          |
| $\frac{d(inputDelay)}{dt} = input_1 - sink_{input}$                                                                       | Delay state                             | $-4.86 \times 10^{-15}$                      | $-1.00 \times 10^{-16}$                       |
| $\frac{d(glu)}{dt} = input_2 - glu_{sink}$                                                                                | Glutamate release in the synaptic cleft | $-2.53 \times 10^{-17}$                      | $-6.09 \times 10^{-19}$                       |
| $\frac{d(Ca_{Astro})}{dt} = Glutamate_A - calcium_{Astro1} + Ca_{Abas}$                                                   | Calcium influx in the astrocyte         | 27.71                                        | 10.09                                         |
| $\frac{d(AA)}{dt} = calcium_{Astro2} - (AA_i + AA_s)$                                                                     | Change in AA level                      | 386.51                                       | 124.27                                        |
| $\frac{d(constrict)}{dt} = delay3_c - sink_c$                                                                             | Delay states                            | 472.80                                       | 91.66                                         |
| $\frac{d(delay1_i)}{dt} = AA_i - delay1_c$                                                                                |                                         | 50.49                                        | 10.79                                         |
| $\frac{d(delay2_i)}{dt} = delay1_c - delay2_c$                                                                            |                                         | 540.77                                       | 150.93                                        |
| $\frac{d(delay3_i)}{dt} = delay2_c - delay3_c$                                                                            |                                         | 814.2                                        | 179.00                                        |
| $\frac{d(dilate)}{dt} = delay3_d - sink_D$                                                                                | Delay states                            | 210.92                                       | 96.019                                        |
| $\frac{d(delay1_s)}{dt} = AA_s - delay1_d$                                                                                |                                         | 455.61                                       | 143.60                                        |
| $\frac{d(delay2_s)}{dt} = delay1_d - delay2_d$                                                                            |                                         | 280.27                                       | 135.65                                        |
| $\frac{d(delay3_s)}{dt} = delay2_d - delay3_d$                                                                            |                                         | 216.58                                       | 57.206                                        |

| Reactions                                                                                                                                                                                                                                                                                                                                     | Interpretation                                                                                                                                                                                                                                                                              |
|-----------------------------------------------------------------------------------------------------------------------------------------------------------------------------------------------------------------------------------------------------------------------------------------------------------------------------------------------|---------------------------------------------------------------------------------------------------------------------------------------------------------------------------------------------------------------------------------------------------------------------------------------------|
| $v_{1f} = k_{1f} \times oHb$<br><br>$v_{1b} = k_{1b} \times dHb \times O_2$                                                                                                                                                                                                                                                                   | Rate of releasing oxyhemoglobin into oxygen and deoxyhemoglobin<br><br>Rate of binding oxygen and deoxyhemoglobin into oxyhemoglobin                                                                                                                                                        |
| $v_{inoHb} = oHb_{body} \times k_{flow}$<br>$v_{outoHb} = oHb \times k_{flow}$<br><br>$v_{indHb} = dHb_{body} \times k_{flow}$<br>$v_{outdHb} = dHb \times k_{flow}$<br><br>$v_{inG} = G_{body} \times k_{flow}$<br>$v_{outG} = glucose \times k_{flow}$<br><br>$v_{inO_2} = O_{2body} \times k_{flow}$<br>$v_{outO_2} = O_2 \times k_{flow}$ | Oxyhemoglobin influx<br>Oxyhemoglobin outflux<br><br>Deoxyhemoglobin influx<br>Deoxyhemoglobin outflux<br><br>Glucose influx<br>Glucose outflux<br><br>Oxygen influx<br>Oxygen outflux                                                                                                      |
| $v_{basal} = k_{basal} \times O_2^{proportion_1} \times glucose$<br>$v_{stim} = inputDelay \times O_2^{proportion_2} \times glucose$                                                                                                                                                                                                          | Basal metabolism<br>Metabolism during stimulation                                                                                                                                                                                                                                           |
| $input_1 = k_{metabolic} \times stimulus$<br><br>$input_2 = k_{neurotrans} \times stimulus$                                                                                                                                                                                                                                                   | Stimulus input to the metabolic module<br>Stimulus input to the neurotransmitter module                                                                                                                                                                                                     |
| $glu_{sink} = glu \times sink_{Glu}$<br>$Glutamate_A = k_2 \times glu$<br>$calcium_{Astro1} = Ca_{Astro} \times sink_A$<br>$calcium_{Astro2} = PL \times Ca_{Astro} \times k_4$<br><br>$sink_C = constrict \times sink_{Con}$<br><br>$sink_D = dilate \times sink_{Dil}$<br><br>$AA_i = k_5 \times AA$<br><br>$AA_s = k_7 \times AA$          | Glutamate breakdown<br>Calcium influx into the cells<br>Calcium outflux from the cells<br>Calcium inducing AA<br><br>Breakdown of vasoconstricting substances<br>Breakdown of vasodilating substances<br>AA triggering vasoconstricting substances<br>AA triggering vasodilating substances |
| $delay1_d = k_{delay1s} \times delay1_s$<br>$delay2_d = k_{delay2s} \times delay2_s$<br>$delay3_d = k_{delay3s} \times delay3_s$                                                                                                                                                                                                              | Delay states                                                                                                                                                                                                                                                                                |
| $delay1_c = k_{delay1i} \times delay1_i$<br>$delay2_c = k_{delay2i} \times delay2_i$<br>$delay3_c = k_{delay3i} \times delay3_i$                                                                                                                                                                                                              | Delay states                                                                                                                                                                                                                                                                                |

### 3.2.3 Variables

| Variable name | Variable unit | Variable value                              | Interpretation                            |
|---------------|---------------|---------------------------------------------|-------------------------------------------|
| $k_{flow}$    | 1/s           | $k_{flow_{O_2}} + stimulating - inhibiting$ | Blood flow                                |
| $G_{body}$    | amount        | 10                                          | Glucose in arterial blood                 |
| $O_{2body}$   | amount        | 10                                          | Oxygen in arterial blood                  |
| $oHb_{body}$  | amount        | 10                                          | Oxygenated hemoglobin in arterial blood   |
| $dHb_{body}$  | amount        | 10                                          | Deoxygenated hemoglobin in arterial blood |
| Stimulating   | 1/s           | $b_1 \times dilate$                         | Vasodilation                              |
| Inhibiting    | 1/s           | $b_2 \times constrict$                      | Vasoconstriction                          |
| $\hat{y}$     | unitless      | $\frac{k_y \times oHb}{dHb}$                | Output signal                             |



### 3.2.4 Parameters and parameter values

Parameter sets for model  $M_{nm1}$  used in Fig. 9 and Fig. 10.

| Parameter names                    | Parameter unit             | p8 best opt intensity data | p10 best opt frequency data |
|------------------------------------|----------------------------|----------------------------|-----------------------------|
| $k_y$                              | unitless                   | 3327.7279                  | 3177.2096                   |
| $k_{\text{metabolic}}$             | 1/s                        | 2425.3854                  | 13592.202                   |
| $k_{\text{neurotrans}}$            | 1/s                        | 140.35                     | 195.9126                    |
| $k_{1f}$                           | 1/s                        | 2289.8029                  | 6996.381                    |
| $k_{1b}$                           | 1/(amount×s)               | 38.0878                    | 72.7303                     |
| $k_{\text{basal}}$                 | 1/(amount×s)               | 4751.4719                  | 8097.4782                   |
| $k_{\text{flow}_{\text{glucose}}}$ | amount/s                   | 524.89                     | 1275.8673                   |
| proportion1                        | oxygen/glucose metabolised | 8.6087                     | 8.5580                      |
| proportion2                        | oxygen/glucose metabolised | 3.8694                     | 3.8495                      |
| $\text{sink}_{\text{Input}}$       | 1/s                        | 0.6735                     | 4.5253                      |
| $k_2$                              | 1/s                        | 0.4703                     | 0.7295                      |
| $k_4$                              | 1/(amount×s)               | 0.9977                     | 1.2737                      |
| $k_5$                              | 1/s                        | 0.5446                     | 0.7809                      |
| $k_7$                              | 1/s                        | 0.6699                     | 0.5886                      |
| $\text{Ca}_{\text{Abas}}$          | 1/s                        | 14.8381                    | 20.5285                     |
| $\text{sink}_{\text{Glu}}$         | 1/s                        | 6.4284                     | 12.5502                     |
| $\text{sink}_A$                    | 1/s                        | 1.4713                     | 0.7409                      |
| $\text{sink}_{\text{Con}}$         | 1/s                        | 0.7384                     | 0.6384                      |
| $\text{sink}_{\text{Dil}}$         | 1/s                        | 1.4552                     | 1.0505                      |
| $k_{\text{delay1s}}$               | 1/s                        | 0.867                      | 1.0787                      |
| $k_{\text{delay2s}}$               | 1/s                        | 0.5797                     | 0.4994                      |
| $k_{\text{delay3s}}$               | 1/s                        | 0.6137                     | 0.81178                     |
| $k_{\text{delay1i}}$               | 1/s                        | 6.2735                     | 5.9784                      |
| $k_{\text{delay2i}}$               | 1/s                        | 0.4484                     | 0.5582                      |
| $k_{\text{delay3i}}$               | 1/s                        | 0.3781                     | 0.3707                      |
| PL                                 | amount                     | 15                         | 15                          |
| $b_1$                              | 1/(amount×s)               | 30.379                     | 41.1749                     |
| $b_2$                              | 1/(amount×s)               | 13.2335                    | 12.9425                     |

Cost: p8 = 27.5 and p10 = 18.8
